# Supplementary material
Source: PubMed Central journal article supplement (PMC4936107)
Supplement: JB.00141-16_zjb999094100so1.pdf [file JB.00141-16_zjb999094100so1.pdf]

**SUPPLEMENTARY MATERIALS**

**Efficient sulfide assimilation in *Methanosarcina acetivorans* is mediated by the MA1715 protein**

**Benjamin J. Rauch and John J. Perona**

**TABLE S1.**  
Detection of sulfur-containing compounds in *M. acetivorans*

| strain                                | acid labile sulfide<br>(nmol/mg protein) | tRNA<br>thiolation? |
|---------------------------------------|------------------------------------------|---------------------|
| <i>wt</i> -like                       | -                                        | yes <sup>a</sup>    |
| $\Delta ma1715$                       | -                                        | yes <sup>a</sup>    |
| $\Delta oass\Delta oahs$              | 14.4 $\pm$ 1.9                           | yes <sup>a</sup>    |
| $\Delta oass\Delta oahs\Delta ma1715$ | 14.0 $\pm$ 0.8                           | yes <sup>a</sup>    |

<sup>a</sup> see Fig 5 for details

**TABLE S2.** List of primers used

1. CCCGAAACACTAGTATTGTGTCGCCAGAATAAGC
2. GTGATTTTCGGCACCTCCGCCAGCTTGTCTGGCGGCCCTTAC
3. CAAGCTGGCGGAGGTGCCGAAAATCACAAAGAGCCGAGGTCAGGCATG
4. CATCGGGAGCTGGTACCGGGTTCTCCC
5. CCCCAAGTGAATCCATATGCCAGAACCC
6. GCCGCCCAACACTCGAGTTTTGTAATATACTCATGCC
7. GGAGATATACGCATGCCAGAACCCAC
8. CCTTTCGGGCCCTGTTAGCAGC
9. GAGGCAAAGTACAGATTCTTCTGGACAGGTGG
10. CCTATGTA CTCCCCCTGAATCACAAAGTGCCC

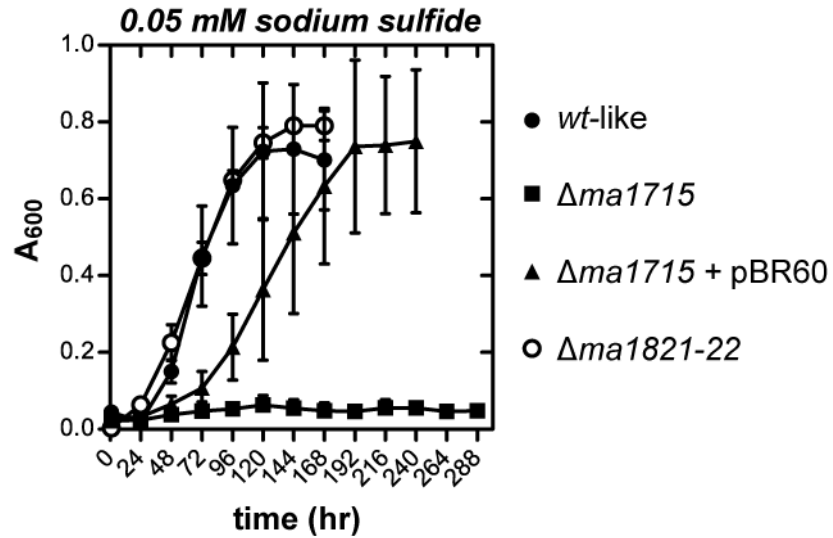

**FIG S1.** Growth of *M. acetivorans* strains on HS<sub>DTT</sub> medium supplemented with 0.05 mM sodium sulfide. The  $\Delta ma1715 + pBR60$  experiment was conducted in the presence of 0.05 mg/ml tetracycline-HCl. All data points represent the mean of at least three experiments. Error bars reflect standard deviations. Starter cultures were grown to late exponential phase ( $0.3 < A_{600} < 0.7$ ) on the HS<sub>Met</sub> medium, which contains 0.4 mM sulfide, 3 mM cysteine and 3 mM methionine. These were diluted into experimental HS<sub>DTT</sub> media so that  $A_{600}$  would equal 0.01 upon inoculation.

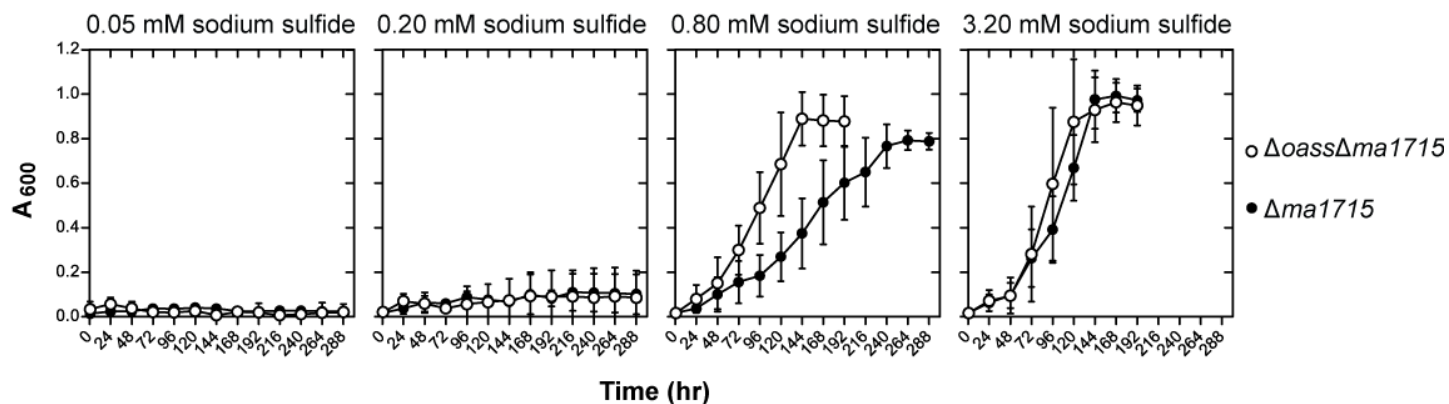

**FIG S2.** Growth of *M. acetivorans* strains with different concentrations of sodium sulfide, present as the sole sulfur source. All data points represent the mean of at least three experiments. Error bars reflect standard deviations. Prior to each experiment, strains were grown for at least 12 generations with 0.8 mM sodium sulfide present as the sole sulfur source. Data for the  $\Delta ma1715$  experiments were re-plotted from Fig. 3.

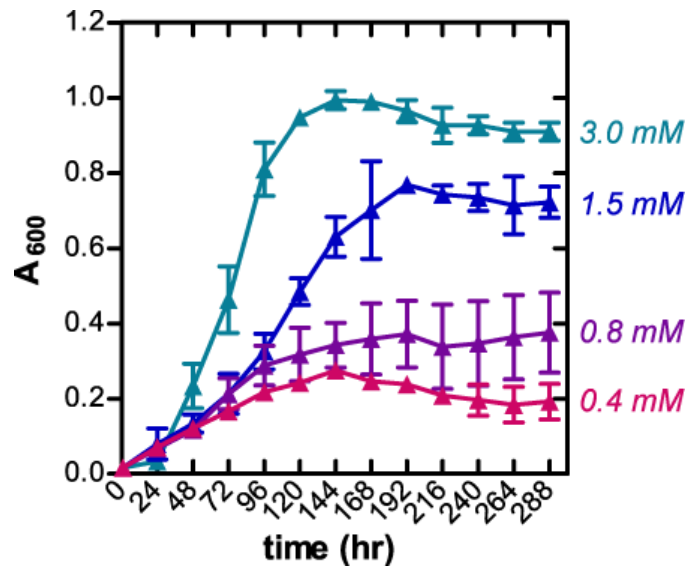

**FIG S3.** Growth of the  $\Delta oass\Delta oahs\Delta ma1715$  strain with varying concentrations of homocysteine as the sole sulfur source.
